# Supplementary material
Source: PubMed Central journal article supplement (PMC8541932)
Supplement: NIHMS1743183-supplement-Appendix.pdf [file NIHMS1743183-supplement-Appendix.pdf]

**Appendix**  
**Air Quality Awareness and Behaviors of U.S. Adolescents With and Without Asthma**  
**Lynch and Mirabelli**

**Appendix Table 1.** Air Quality Awareness and Perceptions Among U.S. Youth With and Without Asthma, by Demographic Characteristics

| Survey questions                                                                                   | All respondents |                        | With asthma    |                        | Without asthma |                        |
|----------------------------------------------------------------------------------------------------|-----------------|------------------------|----------------|------------------------|----------------|------------------------|
|                                                                                                    | n <sup>a</sup>  | Weighted %<br>(95% CI) | n <sup>a</sup> | Weighted %<br>(95% CI) | n <sup>a</sup> | Weighted %<br>(95% CI) |
| Do you think air pollution can impact a person's health in any way?                                |                 |                        |                |                        |                |                        |
| Age, years                                                                                         |                 |                        |                |                        |                |                        |
| 12–13                                                                                              | 246             | 83.3 (78.2, 88.3)      | 28             | 90.2 (79.5, 100.0)     | 218            | 82.5 (77.0, 87.9)      |
| 14–15                                                                                              | 232             | 85.1 (79.6, 90.7)      | 27             | 86.4 (73.6, 99.1)      | 205            | 84.9 (78.8, 91.0)      |
| 16–17                                                                                              | 235             | 90.6 (86.3, 94.9)      | 18             | 78.9 (56.0, 100.0)     | 217            | 91.9 (88.0, 95.8)      |
| Sex                                                                                                |                 |                        |                |                        |                |                        |
| Female                                                                                             | 362             | 87.1 (83.0, 91.3)      | 38             | 87.1 (72.5, 100.0)     | 324            | 87.1 (82.9, 91.4)      |
| Male                                                                                               | 351             | 85.7 (81.7, 89.7)      | 35             | 83.4 (71.4, 95.3)      | 316            | 86.0 (81.8, 90.3)      |
| Race/ethnicity                                                                                     |                 |                        |                |                        |                |                        |
| White, non-Hispanic                                                                                | 445             | 85.3 (81.6, 89.0)      | 36             | 88.9 (80.1, 97.8)      | 409            | 84.9 (80.9, 88.9)      |
| Black, non-Hispanic                                                                                | 49              | 77.7 (66.4, 89.0)      | 6              | 55.0 (19.7, 90.3)      | 43             | 82.0 (71.1, 93.0)      |
| Other, non-Hispanic                                                                                | 52              | 91.9 (83.7, 100.0)     | 5              | 100.0 (100.0, 100.0)   | 47             | 91.0 (82.1, 100.0)     |
| Hispanic                                                                                           | 124             | 91.0 (85.6, 96.4)      | 16             | 93.1 (83.5, 100.0)     | 108            | 90.7 (84.7, 96.7)      |
| ≥2 races, non-Hispanic                                                                             | 43              | 93.7 (87.8, 99.6)      | 10             | 100.0 (100.0, 100.0)   | 33             | 91.4 (83.5, 99.3)      |
| Parental educational attainment                                                                    |                 |                        |                |                        |                |                        |
| High school or less                                                                                | 132             | 77.5 (69.9, 85.2)      | 18             | 71.4 (50.9, 92.0)      | 114            | 78.8 (70.5, 87.0)      |
| Some college                                                                                       | 229             | 89.4 (85.2, 93.6)      | 24             | 94.5 (86.9, 100.0)     | 205            | 88.8 (84.3, 93.4)      |
| Bachelor's or higher                                                                               | 352             | 90.0 (86.7, 93.2)      | 31             | 94.2 (86.4, 100.0)     | 321            | 89.6 (86.1, 93.0)      |
| Region                                                                                             |                 |                        |                |                        |                |                        |
| Northeast                                                                                          | 130             | 83.4 (75.2, 91.7)      | 16             | 100.0 (100.0, 100.0)   | 114            | 80.8 (71.6, 90.1)      |
| Midwest                                                                                            | 167             | 86.3 (80.9, 91.7)      | 13             | 80.1 (61.7, 98.5)      | 154            | 86.9 (81.2, 92.5)      |
| South                                                                                              | 248             | 84.6 (79.5, 89.6)      | 26             | 74.3 (55.1, 93.4)      | 222            | 86.1 (81.1, 91.1)      |
| West                                                                                               | 168             | 91.3 (86.6, 96.1)      | 18             | 96.0 (88.3, 100.0)     | 150            | 90.7 (85.5, 96.0)      |
| Metropolitan status                                                                                |                 |                        |                |                        |                |                        |
| Metropolitan area                                                                                  | 614             | 86.9 (83.8, 90.0)      | 61             | 86.8 (76.4, 97.2)      | 553            | 86.9 (83.7, 90.1)      |
| Non-metropolitan area                                                                              | 99              | 83.2 (75.3, 91.2)      | 12             | 79.2 (57.6, 100.0)     | 87             | 84.1 (75.6, 92.6)      |
| Do you think there are things you can do to limit your or your family's exposure to air pollution? |                 |                        |                |                        |                |                        |
| Age, years                                                                                         |                 |                        |                |                        |                |                        |
| 12–13                                                                                              | 172             | 55.9 (49.0, 62.7)      | 14             | 45.8 (27.0, 64.6)      | 158            | 57.0 (49.7, 64.3)      |
| 14–15                                                                                              | 170             | 61.5 (54.4, 68.7)      | 21             | 61.3 (40.4, 82.1)      | 149            | 61.6 (54.0, 69.2)      |
| 16–17                                                                                              | 177             | 68.6 (62.0, 75.2)      | 14             | 57.4 (32.0, 82.7)      | 163            | 69.9 (63.2, 76.5)      |
| Sex                                                                                                |                 |                        |                |                        |                |                        |
| Female                                                                                             | 265             | 60.9 (55.1, 66.8)      | 30             | 67.3 (49.4, 85.2)      | 235            | 60.1 (54.0, 66.2)      |
| Male                                                                                               | 254             | 63.3 (57.8, 68.7)      | 19             | 43.9 (26.6, 61.3)      | 235            | 65.7 (60.1, 71.4)      |

**Appendix**  
**Air Quality Awareness and Behaviors of U.S. Adolescents With and Without Asthma**  
**Lynch and Mirabelli**

|                                        |     |                   |    |                    |     |                   |  |
|----------------------------------------|-----|-------------------|----|--------------------|-----|-------------------|--|
| <b>Race/ethnicity</b>                  |     |                   |    |                    |     |                   |  |
| White, non-Hispanic                    | 318 | 60.1 (55.2, 65.0) | 23 | 54.8 (37.5, 72.1)  | 295 | 60.6 (55.5, 65.7) |  |
| Black, non-Hispanic                    | 33  | 50.5 (36.9, 64.2) | 6  | 55.0 (19.7, 90.3)  | 27  | 49.7 (34.9, 64.5) |  |
| Other, non-Hispanic                    | 39  | 61.5 (46.5, 76.6) | 3  | 46.3 (0.0, 96.3)   | 36  | 63.1 (47.5, 78.8) |  |
| Hispanic                               | 100 | 73.9 (65.5, 82.3) | 12 | 65.2 (39.4, 91.1)  | 88  | 75.1 (66.3, 84.0) |  |
| ≥2 Races, non-Hispanic                 | 29  | 55.8 (38.8, 72.9) | 5  | 36.7 (2.7, 70.8)   | 24  | 62.5 (44.7, 80.3) |  |
| <b>Parental educational attainment</b> |     |                   |    |                    |     |                   |  |
| High school or less                    | 100 | 57.1 (48.2, 66.0) | 9  | 30.6 (10.4, 50.8)  | 91  | 62.5 (53.0, 71.9) |  |
| Some college                           | 162 | 61.3 (54.4, 68.3) | 17 | 67.4 (47.7, 87.1)  | 145 | 60.7 (53.3, 68.0) |  |
| Bachelor's or higher                   | 257 | 66.3 (60.9, 71.7) | 23 | 76.4 (61.9, 90.9)  | 234 | 65.2 (59.5, 71.0) |  |
| <b>Region</b>                          |     |                   |    |                    |     |                   |  |
| Northeast                              | 101 | 63.8 (54.3, 73.3) | 13 | 88.8 (75.5, 100.0) | 88  | 59.8 (49.6, 70.0) |  |
| Midwest                                | 118 | 59.2 (51.2, 67.2) | 9  | 54.3 (29.1, 79.5)  | 109 | 59.6 (51.2, 68.0) |  |
| South                                  | 188 | 63.8 (57.2, 70.5) | 16 | 41.4 (21.9, 60.9)  | 172 | 67.1 (60.3, 74.0) |  |
| West                                   | 112 | 61.1 (52.7, 69.6) | 11 | 55.3 (28.3, 82.2)  | 101 | 61.9 (53.0, 70.7) |  |
| <b>Metropolitan status</b>             |     |                   |    |                    |     |                   |  |
| Metropolitan area                      | 452 | 63.8 (59.6, 68.1) | 44 | 63.2 (49.3, 77.0)  | 408 | 63.9 (59.4, 68.4) |  |
| Non-metropolitan area                  | 67  | 51.1 (40.5, 61.8) | 5  | 26.2 (3.5, 48.9)   | 62  | 56.4 (45.0, 67.8) |  |

<sup>a</sup>Unweighted frequency.
